# Supplementary material for: The Development and Applications of a Dual Optical Imaging System for Studying Glioma Stem Cells
Source: PubMed Central journal article supplement — Mol Imaging. 2019 Sep 3;18:1536012119870899. doi: 10.1177/1536012119870899 (PMC6724491; doi:10.1177/1536012119870899), 2019-09-03
Supplement: Supplementary_Figure_1_Characterization_of_U87MG.pdf [file Supplementary_Figure_1_Characterization_of_U87MG.pdf]

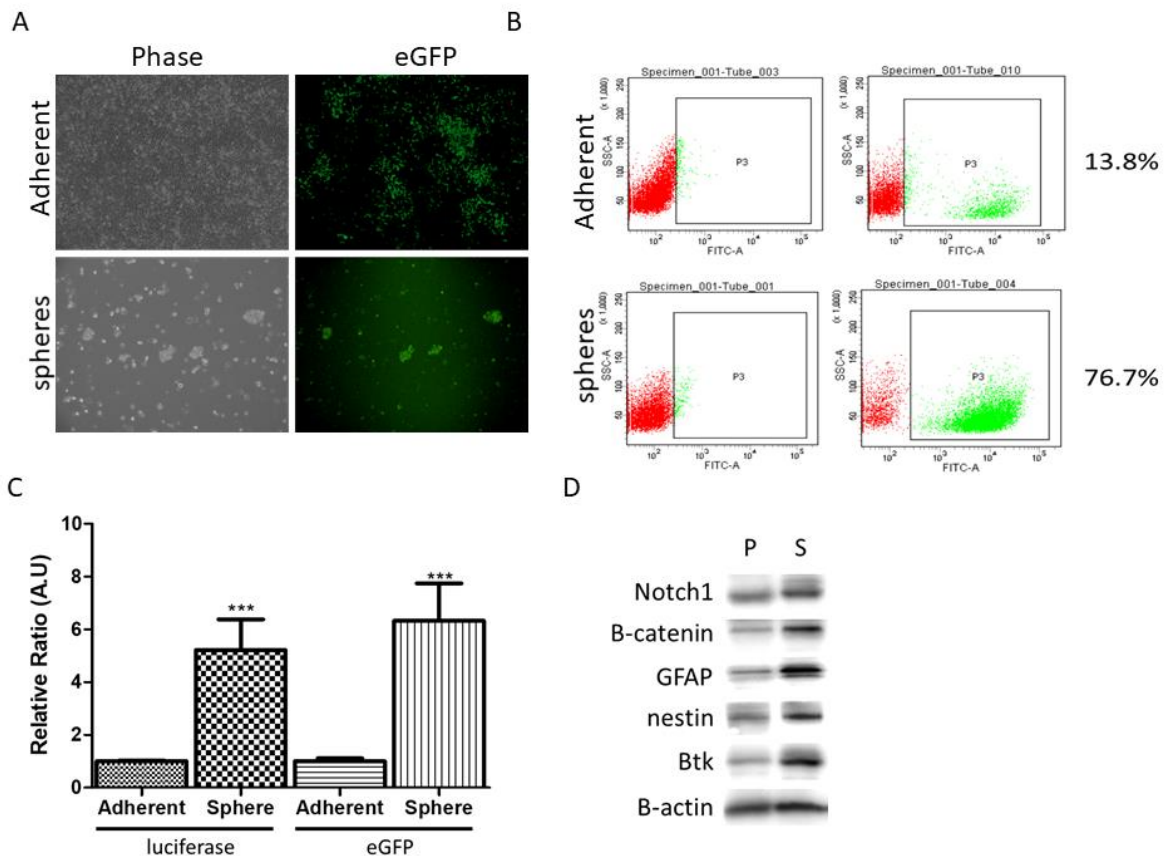

**Supplementary Figure 1** Characterization of U87MG-CD133-LG GBM cells. (A) Lentiviral-infected U87MG cells. Immunofluorescent microscopy demonstrated an increased GFP signal in the neurospheres generated from U87MG-CD133-LG as compared to their adherent counterparts. (B) Flow cytometric analysis. Neurospheres generated from U87MG-CD133-LG cells were 76.7% positive for CD133 and GFP while only 13.8% in the adherent counterparts. (C) Dual reporter assay. U87MG-CD133-LG neurospheres showed significantly increased level of luciferase activity and GFP signal comparing to their adherent counterparts. (D) Comparative western blot analysis of parental and spheres generated from U87MG-CD133-LG. Stemness markers, Notch1,  $\beta$ -catenin, nestin and Btk were markedly elevated but neural-differentiation marker GFAP was decreased in the sorted cells when compared with their parental counterparts.
